# Supplementary material for: A transparent ionogel with mechanical robustness enabled by synergistic noncovalent interactions
Source: Royal Society of Chemistry journal article supplement (doi:10.1039/d4tc04843a), 2025-01-01
Supplement: d4tc04843a4.pdf [file d4tc04843a4.pdf]

# Supporting information

## **A Transparent Ionogel with Mechanical Robustness Enabled by Synergistic Noncovalent Interactions†**

Ran Wei, Chuanjiang Zhou, Sijia Yang, Wei Sun, Shengjie Liu, Zhaoqiang Wu\* and Hong Chen

Key Laboratory of Polymeric Materials Design and Synthesis for Biomedical Function, College of Chemistry, Chemical Engineering and Materials Science, Soochow University, Suzhou 215123, P. R. China

\*Corresponding author: E-mail: wzqwhu@suda.edu.cn (Z.Q. Wu); Tel: +86-512-65884279, Fax: +86-512-65880567

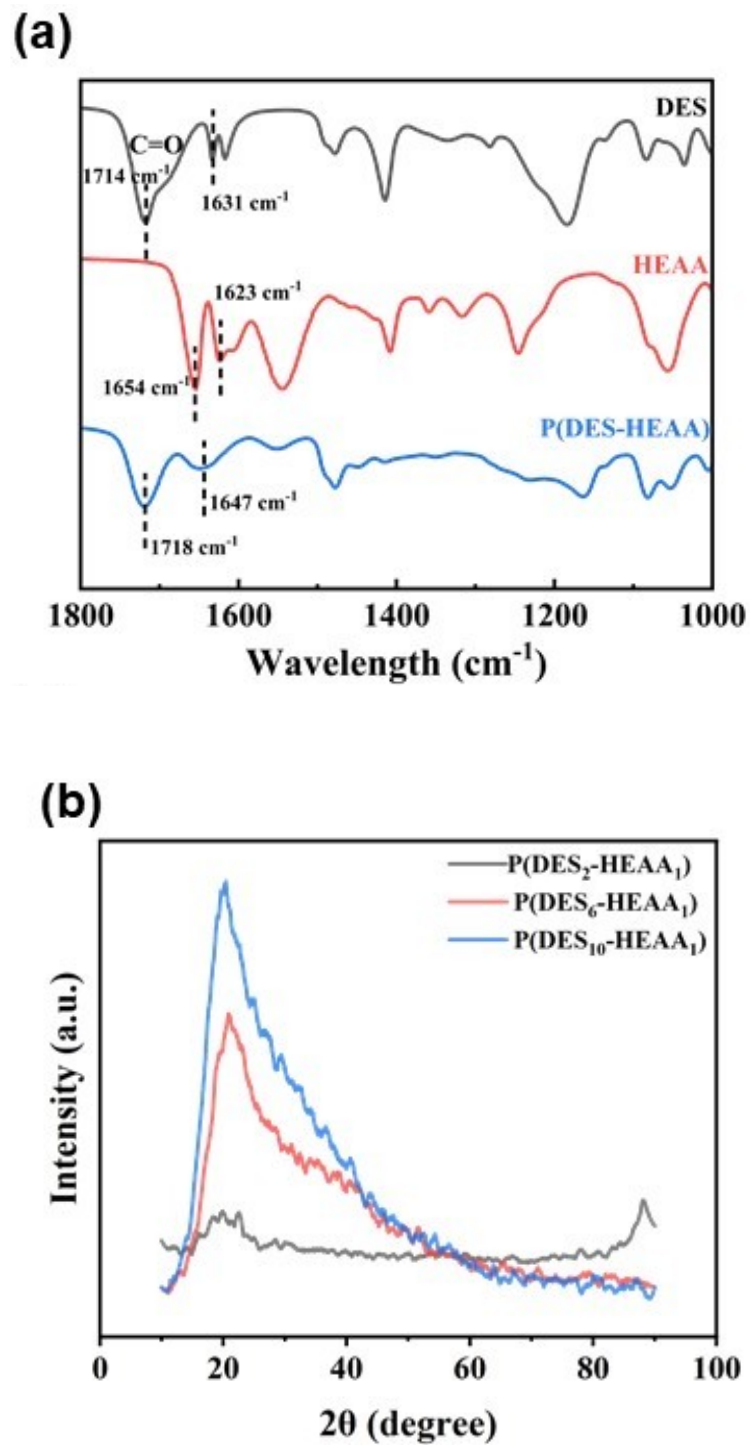

Fig. S1 P(DES-HEAA) elastomer: (a) infrared spectrum; (b) XRD patterns.

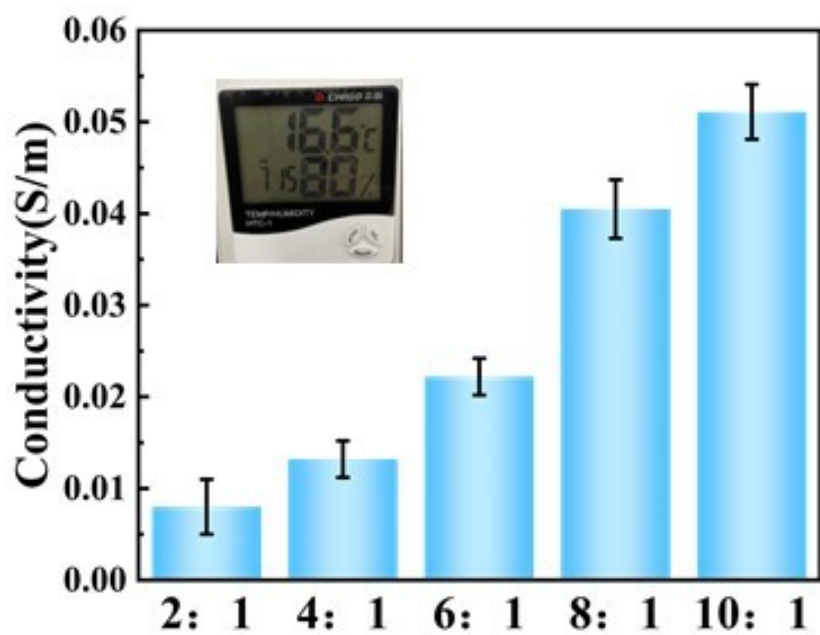

Fig. S2 Conductivity of P(DES-HEAA) elastomers with different proportions at 80% humidity.

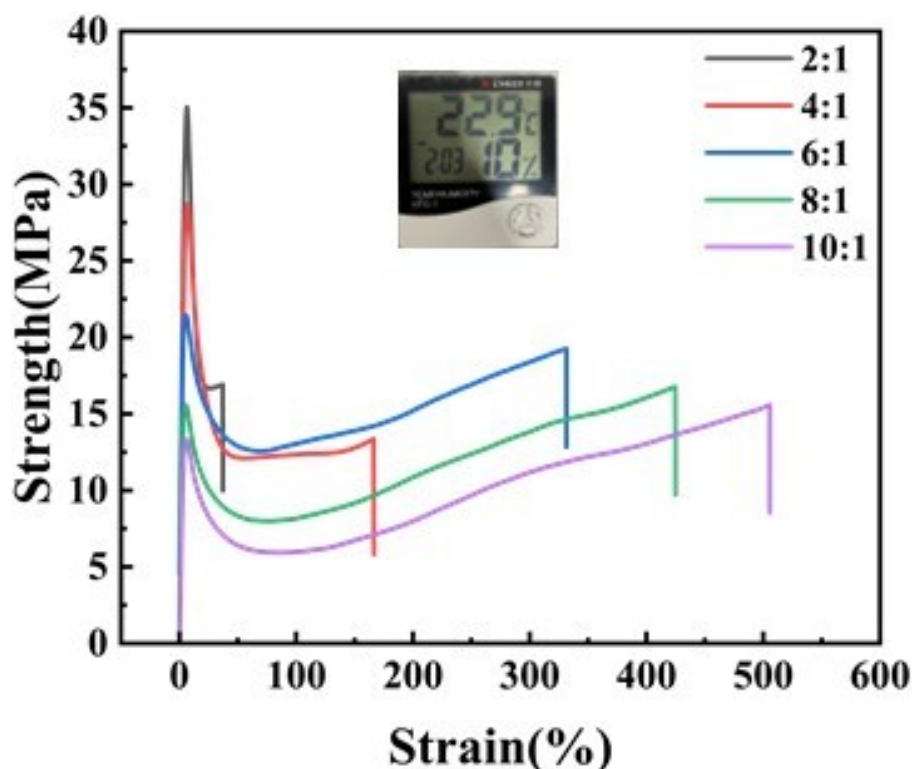

Fig. S3 Tensile stress–strain curves of different proportions of P(DES–HEAA) in the case of a humidity of 10%.

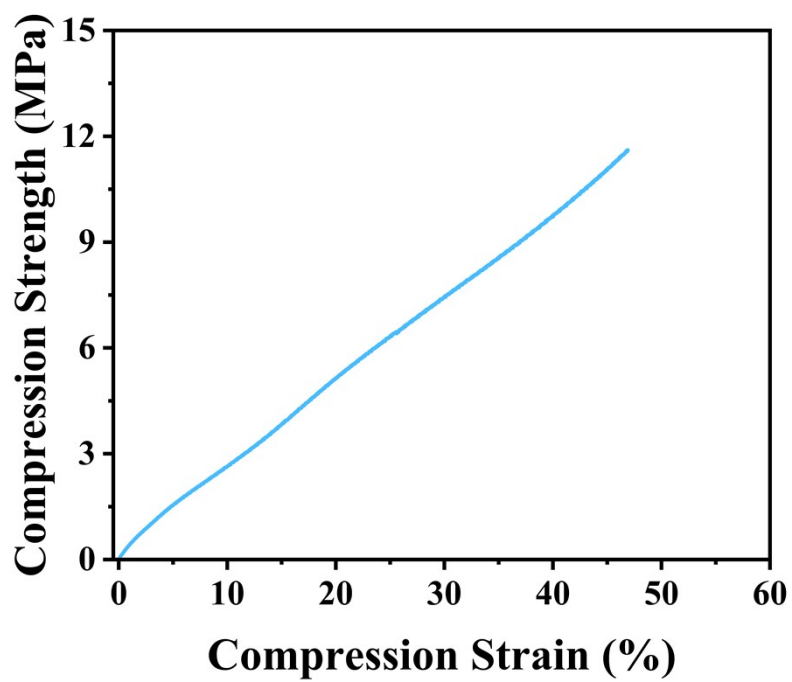

**Fig. S4** Compressive stress–strain curves of P(DESe<sub>10</sub>--HEAA<sub>1</sub>).

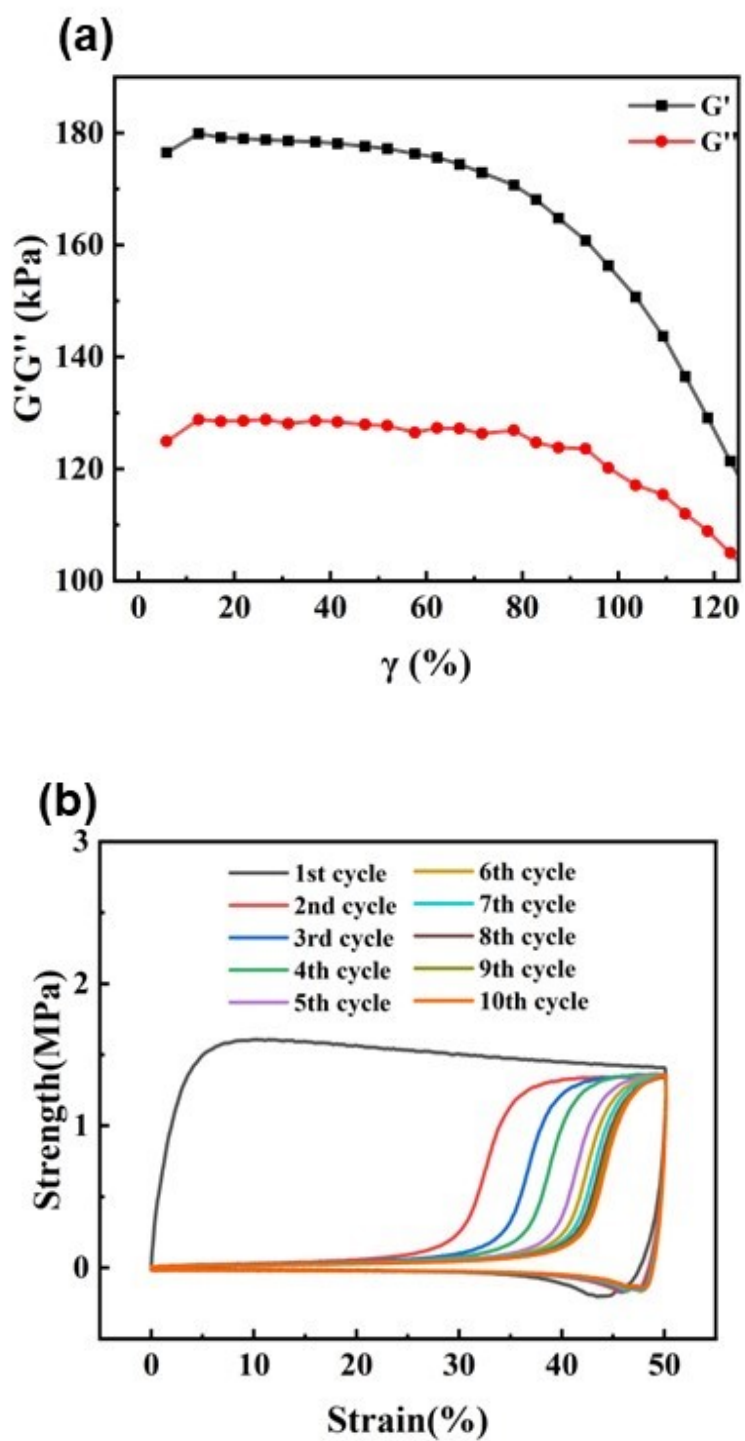

**Fig. S5** P(DESe<sub>6</sub>-HEAA<sub>1</sub>) elastomer: (a) strain scanning rheological diagram; (b) 10 cycles of loading–unloading at 50% strain.

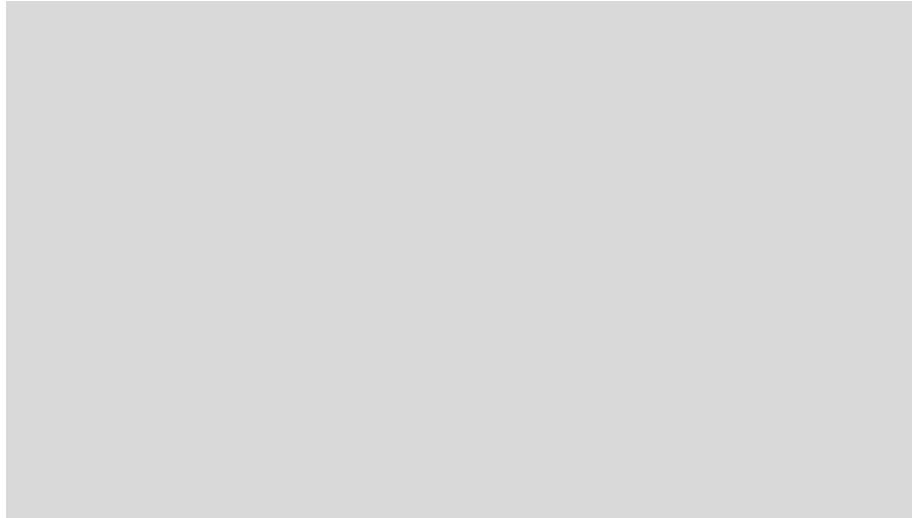

**Fig. S6** In the case of 100% strain, the resistance change of P(DESS<sub>6</sub>-HEAA<sub>1</sub>) elastomer after 50 cycles.

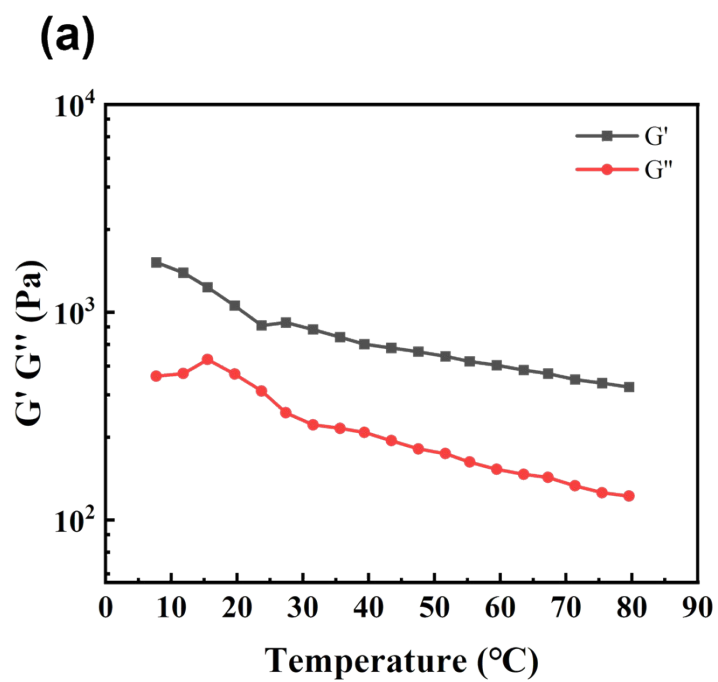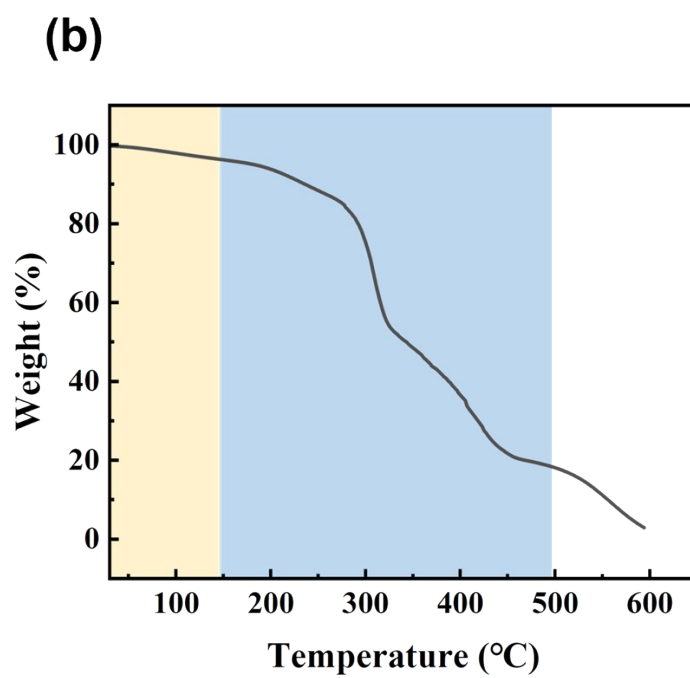

**Fig. S7** P(DESe<sub>6</sub>-HEAA<sub>1</sub>) elastomer: (a) fixed angular frequency of 10 rad s<sup>-1</sup>, 0–80 $^{\circ}\text{C}$  rheological curve; (b) TGA curve.

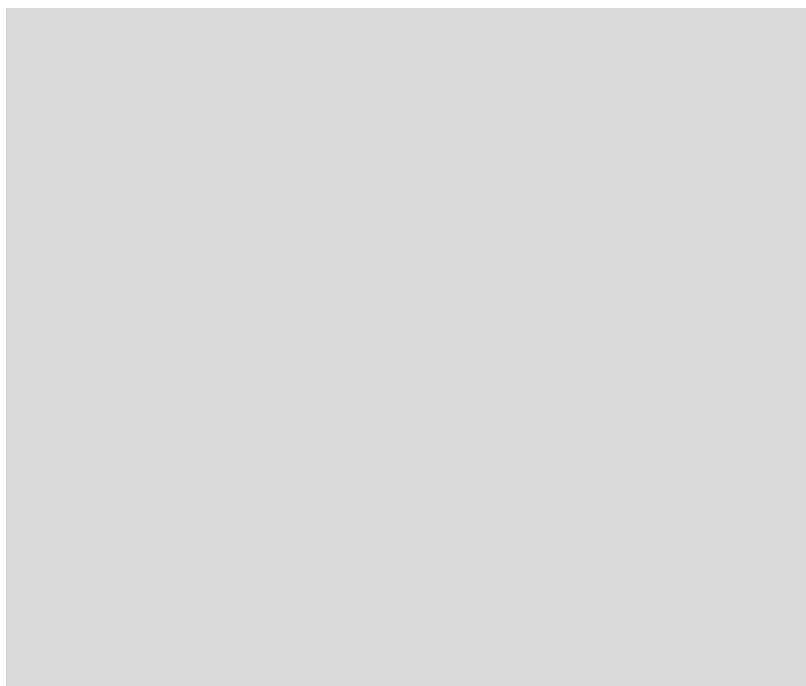

**Fig. S8** TGA curve of elastomer modified fabric.

**Table S1** Comparison of the tensile strengths of some reported elastomers based on AA/ChCl and the P(DES<sub>2</sub>-HEAA<sub>1</sub>) elastomer in this work

| <b>Type</b>                     | <b>Mechanical Property<br/>(Tensile strength)</b> |
|---------------------------------|---------------------------------------------------|
| <b>This Work</b>                | ~26.4 MPa                                         |
| <b>AA/ChCl-PA<sup>1</sup></b>   | ~0.44 MPa                                         |
| <b>AA/ChCl-IA<sup>2</sup></b>   | ~1.08 MPa                                         |
| <b>AA/ChCl-AMPS<sup>3</sup></b> | ~5.7 MPa                                          |
| <b>AA/ChCl-DMA<sup>4</sup></b>  | ~9.27 MPa                                         |



**Table S2** Comparison of the mechanical properties of this work with those of several reported high-performance elastomers

|                         | <b>Tensile strength</b> | <b>Elongation at break</b> | <b>Young's modulus</b> |
|-------------------------|-------------------------|----------------------------|------------------------|
| <b>This Work</b>        | ~26.4 MPa               | ~136.2%                    | ~907 MPa               |
| <b>Ref.<sup>5</sup></b> | ~49.3 MPa               | ~800%                      | ~305.4 MPa             |
| <b>Ref.<sup>6</sup></b> | ~26.4 MPa               | ~1363%                     | ~1.5 MPa               |
| <b>Ref.<sup>7</sup></b> | ~ 77.7MPa               | ~505.4%                    | ~ 382.5MPa             |
| <b>Ref.<sup>8</sup></b> | ~24.8 MPa               | ~800%                      | ~74.4 MPa              |

## Reference:

1. R. a. Li, T. Fan, G. Chen, H. Xie, B. Su and M. He, *Chemical Engineering Journal*, 2020, **393**,124685.
2. Y. Jin, J. Li, M. Zhang, J. He and P. Ni, *Chemical Communications*, 2023, **59**, 12998-13001.
3. P. Sang, R. a. Li, K. Zhang, G. Chen, K. Zhao and M. He, *ACS Applied Polymer Materials*, 2022, **4**, 3543-3551.
4. W. Xia, L. Wang, Y. Yu, W. Wang, Z. Wu and H. Chen, *Soft Matter*, 2023, **19**, 3925-3932.
5. X. Zhu, C. Zhou, Z. Pan, J. Yuan and M. Pan, *ACS Applied Polymer Materials*, 2024, **6**, 13389-13400.
6. R. Guo, Q. Zhang, Y. Wu, H. Chen, Y. Liu, J. Wang, X. Duan, Q. Chen, Z. Ge and Y. Zhang, *Advanced Materials*, 2023, **35**,2212130.
7. Z. Hanyu, J. Ying, W. Xiaochun, S. Xinkang, Z. Jiali, C. Junhao, C. Guangxue and H. Minghui, *Journal of Materials Chemistry A*, 2024, **12**, 29941-29947.
8. Y. Gu, W. Wu, C. Zhang, X. Li, X. Guo, Y. Wang, Y. Yuan, B. Jiang and Y. Jin, *Advanced Functional Materials*, 2024, DOI: 10.1002/adfm.202417206.
